# Supplementary material for: MinION, a portable long-read sequencer, enables rapid vaginal microbiota analysis in a clinical setting
Source: PubMed Central journal article supplement (PMC8953062; doi:10.1186/s12920-022-01218-8), 2022-03-25
Supplement: 12920_2022_1218_MOESM2_ESM.pdf [file 12920_2022_1218_MOESM2_ESM.pdf]

**a**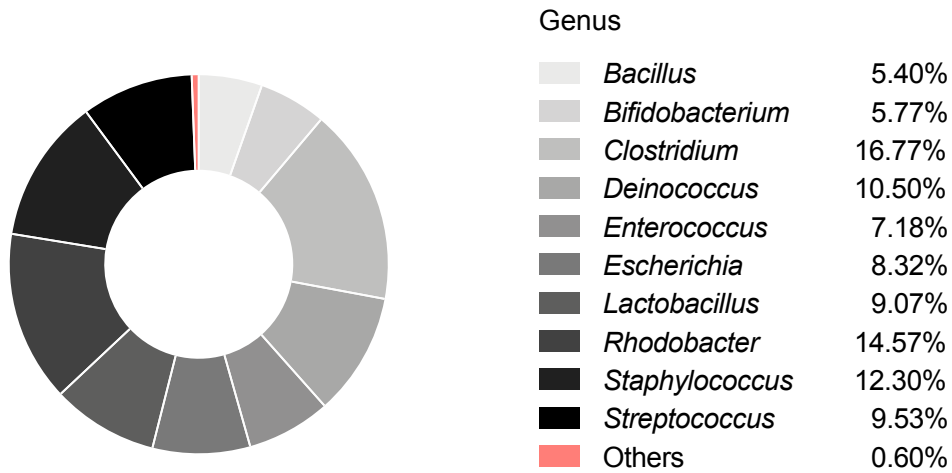**b**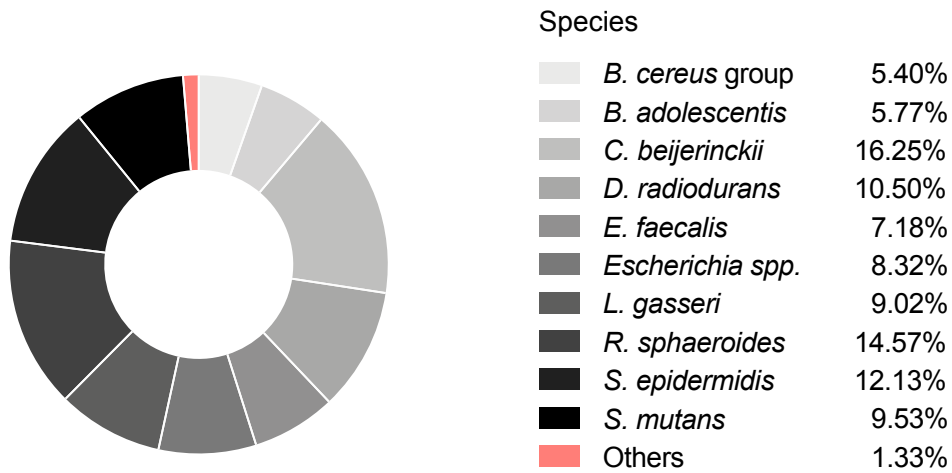

**Supplementary Fig. S1** Taxonomic assignments of a mock community of 10 known bacterial species analyzed by MinION sequencing. The near full-length (V1-9) 16S rRNA genes were amplified from a mock community sample (ATCC 10 Strain Even Mix Genomic Material, MSA-1000), comprising the following bacterial strains: *Bacillus cereus*, *Bifidobacterium adolescentis*, *Clostridium beijerinckii*, *Deinococcus radiodurans*, *Enterococcus faecalis*, *Escherichia coli*, *Lactobacillus gasseri*, *Rhodobacter sphaeroides*, *Staphylococcus epidermidis*, and *Streptococcus mutans*. The resulting amplicons were sequenced on the MinION platform, and randomly sampled 3000 reads were used for taxonomic profiling. The relative abundances (%) of each taxon at the (a) genus and (b) species levels are shown. Misclassified (assigned to bacteria not present in the mock community) or unclassified reads are presented as "Others". Species-level discrimination is not possible for members of the *Bacillus cereus* group and *Escherichia* species, sharing high 16S rRNA gene sequence similarities within the genera.
